# Supplementary material
Source: PubMed Central journal article supplement (PMC8385553)
Supplement: NEJMoa2103784_appendix.pdf [file NEJMoa2103784_appendix.pdf]

## Supplementary Appendix

This appendix has been provided by the authors to give readers additional information about their work.

Supplement to: Korley FK, Durkalski-Mauldin V, Yeatts SD, et al. Early convalescent plasma for high-risk outpatients with Covid-19. *N Engl J Med*. DOI: [10.1056/NEJMoa2103784](https://doi.org/10.1056/NEJMoa2103784)

# Early Administration of High Titer Convalescent Plasma in Emergency Department Patients with Mild/Moderate Covid-19 Illness.

The Clinical-trial of Covid-19 Convalescent Plasma in Outpatients (C3PO)

## Supplementary Appendix - Table of Contents

|                                                                                                            |    |
|------------------------------------------------------------------------------------------------------------|----|
| <b>List of Investigators</b>                                                                               | 2  |
| <b>Inclusion / Exclusion Criteria over Time</b>                                                            | 6  |
| <b>Ordinal Scales for Covid-19 Illness Severity</b>                                                        | 9  |
| <b>Serious Adverse Event Reporting</b>                                                                     | 10 |
| <b>Supplemental Tables and Figures</b>                                                                     | 11 |
| Figure S1. Distribution of donor CCP neutralizing antibody titers and association with disease progression | 12 |
| Figure S2. Secondary Efficacy Outcome - Hospital Free Days by Treatment Group                              | 13 |
| Figure S3. Secondary Efficacy Outcome - Time to Worsening of Symptoms                                      | 14 |
| Figure S4. Adverse events, both serious and non-serious, with $\geq 2$ occurrences - by treatment group    | 15 |
| Table S1. Source of CCP Donations                                                                          | 16 |
| Table S2. Post-hoc Sensitivity Analyses Investigating 25 Patients Admitted During the Index Visit          | 17 |
| Table S3. Characteristics of 6 Patients Who Died Within 30 Days From Randomization                         | 18 |
| Table S4. Adverse events, both serious and non-serious, with 1 occurrence listed by treatment group        | 19 |

## List of Investigators

The SIREN-C3PO leadership and site investigators are:

### SIREN Data Coordinating Center - Medical University of South Carolina

Valerie Durkalski-Mauldin PhD, Sharon D. Yeatts PhD, Lydia D. Foster MS, Zeke Lowell BS, Chris Arnaud, Jonathan Beall, Grey Clevenger, Catherine Dillon, Kavita Patel, Keith Pauls, Wenle Zhao

### SIREN Clinical Coordinating Center

Clifton W. Callaway MD PhD, Frederick K. Korley MD PhD, William Barsan MD, Robert Silbergleit MD, Carol Van Huysen BS, Renee Kasperek-Wynn RN BSN, Ruth R.R. Lewis MS RN, Chaitra Madiyal MS, Aimee Spiteri RHIT, Nia Bozeman BA, Emily Pappas BS, Janet Waisanen MA, Michelle Minix BS, Joy Black BSN MS, Deneil Harney MPH MSW, Valerie Stevenson BAS RRT

### Stanford Central Caller Core, Biostatistics and School of Medicine Research Office

Jennifer M. Hah MD MS, Luke Pirrotta BS, Daniela Sarellano MS, Gabrielle Hettie, Kevin Schulman, MD MBA, Manisha Desai PhD, Maya Berdichesky, DMD, Scott Patton

### National Institutes of Health

Nahed El Kassar MD PhD, Jeremy Brown MD, Carolina Mendoza-Puccini MD, George Sopko MD MPH, Emily Tinsley MS

## **SIREN-C3PO Sites (ordered by number of subjects enrolled)**

### Harbor-UCLA Medical Center, Torrance, CA (50)

Kabir Yadav, MDCM, MS, MSHS, Elizabeth Hernandez, Janine LePage, Dina Wilson, Juliana Tolles, MD MHS, Rachel Rangwala, MD

### Cooper University Hospital, Camden, NJ (43)

Christopher Jones, MD, Dylan Kurowsky, BS, Monica Ianosi-Irimie, MD, Lauren Remboski, BS

### Stanford University Medical Center, Stanford, CA (33)

James Quinn, MD MS, Anita Visweswaran, Rosen Mann

### Oregon Health & Science University, Portland, OR (27)

Bory Kea, MD, MCR, FACEP, Jennifer N.B. Cook, BA, GCPH, James Magas, BS, Mohamud Daya, MD, MS

### HealthPartners Methodist Hospital, St. Louis Park, MN (26)

Aaron Burnett, MD, Marissa Peterson, MS, Kendal Farrar, MD, Sandi Wewerka, MPH

### Spectrum Health Hospitals Butterworth Hospital, Grand Rapids, MI (25)

Joshua C. Reynolds, MD, MS, Andrea Reeder, BSN, RN, Kristin Sternhagen, BSN, RN, J. Adam Oostema, MD Jeffrey S. Jones, MD

### University of Michigan, Ann Arbor, MI (24)

Nathan L Haas MD, Colin F Greineder MD PhD, Amanda Melvin MS, ACSM-CEP, Phillip A. Scott MD, MBA

### University of Chicago, Chicago, IL (23)

David G. Beiser, MD, MS, Mustafa Alam, MD, Karli Molignoni, BA

### Baystate Medical Center / University of Massachusetts Medical School – Baystate, Springfield, MA (18)

Howard A Smithline, MS, MD, Kye E. Poronsky, MS, Brianna M. DiFronzo, BS

University of California, Davis, Sacramento, CA (18)

Daniel K. Nishijima, MD, MAS, Donovan S. Nielsen, CCRC, Sarah E. Barnhard, MD

University of California, San Diego – UCSD Health La Jolla, La Jolla, CA (18)

Christopher J. Coyne, MD, MPH, Alexandra Cronin, MPH, Vaishal Tolia, MD, Elizabeth Allen, MD, Kimberly McConnell, PharmD

Cedars-Sinai Medical Center, Los Angeles, CA (12)

Sam Torbati, MD, Ellen Klapper, MD, Antonina Caudill, MPH, CCRC, Emad Bayoumi, MBBCh, Susan Jackman RN, BSN, MS

Rush University Medical Center, Chicago, IL (12)

Yanina Purim-Shem-Tov, MD, MS, FACEP, Pamela Manning, MSRA, CRA, Marites B Gonzaga-Reardon, DNP, APRN, CCNS, CEN

Jackson Memorial Hospital, Miami, FL (11)

John Cienki MD, MSPH, Lilly Lee MD, Shilpi Ganguly, Jackson Anderson

Maine Medical Center, Portland, ME (11)

Michael R. Baumann, MD, Laura Burr, RN, Tania Strout, PhD, RN

Baylor College of Medicine, Houston, TX (10)

Zubaid Rafique, MD, Kelly Keene, BS

Mercy St. Vincent Medical Center, Toledo, OH (10)

Randall W King MD, Dee Tilley RN, CCRC, David Ledrick MD

Regions Hospital, St. Paul, MN (9)

Aaron Burnett, MD, Marissa Peterson, MS, Sandi Wewerka, MPH

Wake Forest Baptist Medical Center, Winston-Salem, NC (9)

Simon A. Mahler, MD, MS, Lauren Koehler, MS, Emmanuel A. Fadeyi, MD

William Beaumont Hospital – Troy Campus, Troy, MI (9)

Aveh Bastani, MD, Pamela Marsack, Nora Daut, MS

Beth Israel Deaconess Medical Center, Boston, MA (8)

Maureen Chase, MD, MPH, Lisa C. Kurt, BA, Conor J. Higgins, BS, Kerry L. O'Brien, MD

Einstein Medical Center, Philadelphia, PA (8)

Joseph Herres, DO, Reha Dharmaraj, MBBS

University of Florida Health Shands Hospital, Gainesville, FL (8)

Lisa H. Merck MD MPH MA FACEP, Emmett T. Martin, MPH, J Peter R Pelletier MD, Kartikeya Cherabuddi, MD

Newton-Wellesley Hospital, Newton, MA (7)

David S. Huckins, MD, MBA, Maureen Dwyer, PhD, Kayla McKenney

William Beaumont – Royal Oak, Royal Oak, MI (7)

Carol L. Clark, MD, MBA, FACEP, Blerina Pople BS, Heather Grace

Geisinger Medical Center, Danville, PA (6)

Chadd K. Kraus, DO, DrPH, Alyssa Temple, RN, BSN, CCRC, Ashley Peters, RN, BSN, CCRC, Christopher J. Wilson, MD

Ohio State University Wexner Medical Center, Columbus, OH (6)

Jeffrey Caterino, MD, MPH, Michael Hill, RN, BSN, Scott Scrape, MD, Jason Bischof, MD

University of Utah Healthcare, Salt Lake City, UT (6)

Robert Stephen, MD, Margaret Carlson, MPH, Scott T. Youngquist, MD, MS, Ryan A Metcalf, MD

University of Iowa Hospitals and Clinics, Iowa City, IA (5)

Olivia E. Bailey, MD, Cole Wymore, BS, Sven Steen, MD, C. Michael Knudson, MD, PhD, Nicholas M. Mohr, MD, MS, Catherine Fairfield, BSN

Detroit Receiving Hospital, Detroit, MI (4)

Brian O'Neil, MD, Farhan Ayaz, MD, Thomas Mazzocco, RN, Valerie Mika, PhD

Henry Ford Hospital, Detroit, MI (4)

Howard A. Klausner, MD, Margaret Beyer, Joseph B. Miller, MD, Christopher A. Lewandowski, M, Ileana Lopez-Plaza, MD

Temple University Hospital, Philadelphia, PA (4)

Nina T. Gentile, MD, Lillian Finlaw, RN

Tufts Medical Center, Boston, MA (4)

Sunil Shroff, MD, FACEP, Saba Mostafavi, Vidya Iyer, MBBS, CPI

University of Illinois at Chicago, Chicago, IL (4)

Marina Del Rios, MD, MS, Ruth Pobee, PhD, Jessica Herrick, MD, David Chan, PharmD, Sally Campbell-Lee, MD, Tracy Cable, MD, Shaveta Khosla, PhD

University of Pittsburgh – UPMC, Pittsburgh, PA (4)

Alexandra Weissman, MD, MS, MPH, Hunter Skroczyk, BS, Sara DiFiore, BA, Peter Adams, BS, NREMT, CCRC, Alesia Kaplan, MD

University of Texas Southwestern – William P. Clements University Hospital, Dallas, TX (4)

Ahamed H. Idris, MD, Paula Arellano-Cruz, BS, David Gallegos, Samuel McDonald, MD

Chandler Regional Medical Center – Dignity Health, Chandler, AZ (3)

Brian Tiffany, MD, PhD, Antonia Griego, Annette Ruiz Taylor, RN, BSN, Sandra M. Ojeda, RN, BSN, SCRNP

Duke University Health Systems, Durham, NC (3)

Samuel Francis, MD, Jeryl Lockley, Alexander T. Limkakeng Jr., MD, MHS, Madison Frazier, Andrew Bouffler, M. Ryan Jackson, MS

Grady Memorial Hospital, Atlanta, GA (3)

Laura Oh, MD, Alex Hall, DHSc, MS, RN, James Sikora, MD, MPH, David W. Wright, MD

University of Cincinnati, Cincinnati, OH (3)

Gregory J. Fermann, MD, Laura Syori, BA, Martin R. Huecker, MD

University of Louisville, Louisville, KY (3)

Martin Huecker, MD, Alyssa Thomas, BS, Hugh Shoff, MD, J. Jeremy Thomas, MD, MBA, Harrison Brown, MD, Benjamin Turner, MD

University of Colorado School of Medicine, Aurora, CO (2)

Adit A. Ginde, MD, MPH, Shelby Shelton, MPH, Jennifer Peers, RN, BSN, Amanda Martinez, MPH, Sarah M. Perman, MD, MSCE

Valleywise Health Medical Center, Phoenix, AZ (2)

Frank LoVecchio, DO, MPH, Mary Mulrow, RN, MN, CCRP

Harper University Hospital, Detroit, MI (1)

Brian O'Neil, MD, Farhan Ayaz, MD, Thomas Mazzocco, RN, Sam Ceckowski BS, Valerie Mika PhD

Loma Linda University Medical Center, Loma Linda, CA (1)

Emily Barrett, MD, Tammy Phan, CCRP, Dustin Smith, MD, Ellen Reibling, PhD

Sinai Grace Hospital, Detroit, MI (1)

Brian O'Neil MD, Farhan Ayaz MD, Thomas Mazzocco RN, Valerie Mika PhD, Sam Ceckowski BS,

SUNY Downstate Medical Center, Brooklyn, NY (1)

Walter Valesky, MD, Nadege Gilles, MPH, Steven R. Levine, MD, Shahriar Zehtabchi, MD

Washington University School of Medicine, St. Louis, MO (1)

Stacey House, MD, PhD, Jamie Mills, BS

## Inclusion / Exclusion Criteria over Time

All patients were enrolled under Protocol Versions 2, 3 or 4.

**Version 2** - Recognized that knowledge about risk factors for progression to severe COVID-19 was evolving. Set CDC-defined risk factors as criteria in order not to exclude important subgroups (e.g. Sickle cell disease and obesity). Clarified that volume of placebo or plasma was <250 ml

**Version 3** - Removed "mild" from description of population, because this word had developed specific meaning by that time that might exclude patients in emergency departments.

**Version 4** - Clarified that the trial was to be conducted in patients with their first episode of COVID-19 after sites reported screening patients with recurrent COVID-19.

**Version 5** - Clarified that randomization had to occur within 7 days of symptom onset. Exclude immunized persons, because both monoclonal antibodies and vaccines had become widely available.

| Protocol Version 1<br>June 17, 2020                                                                                                                                                                                                                                                                           | Protocol Version 2<br>July 2, 2020                                                                                                                                                                                                                                                                                                       | Protocol Version 3<br>September 7, 2020                                                                                                                                                                                                                                                                                           | Version 4<br>November 3, 2020                                                                                                                                                                                                                                                                                                     | Version 5<br>February 16, 2021                                                                                                                                                                                                                                                                                                    |
|---------------------------------------------------------------------------------------------------------------------------------------------------------------------------------------------------------------------------------------------------------------------------------------------------------------|------------------------------------------------------------------------------------------------------------------------------------------------------------------------------------------------------------------------------------------------------------------------------------------------------------------------------------------|-----------------------------------------------------------------------------------------------------------------------------------------------------------------------------------------------------------------------------------------------------------------------------------------------------------------------------------|-----------------------------------------------------------------------------------------------------------------------------------------------------------------------------------------------------------------------------------------------------------------------------------------------------------------------------------|-----------------------------------------------------------------------------------------------------------------------------------------------------------------------------------------------------------------------------------------------------------------------------------------------------------------------------------|
| Adults presenting to the emergency department (ED) with <b>mild</b> , symptomatic, laboratory-confirmed COVID-19 illness, who are at high risk for progression to severe/critical illness, but who are clinically stable for outpatient management at randomization.                                          | Adults presenting to the emergency department (ED) with <b>mild</b> , symptomatic, laboratory-confirmed COVID-19 illness, who are at high risk for progression to severe/critical illness, but who are clinically stable for outpatient management at randomization.                                                                     | Adults presenting to the emergency department (ED) with symptomatic, laboratory-confirmed COVID-19 illness, who are at high risk for progression to severe/critical illness, but who are clinically stable for outpatient management at randomization.                                                                            | Adults presenting to the emergency department (ED) with their <b>first episode</b> of symptomatic, laboratory-confirmed COVID-19 illness, who are at high risk for progression to severe/critical illness, but who are clinically stable for outpatient management at randomization.                                              | Adults presenting to the emergency department (ED) with their first episode of symptomatic, laboratory-confirmed COVID-19 illness, who are at high risk for progression to severe/critical illness, but who are clinically stable for outpatient management at randomization.                                                     |
| <b>Inclusion Criteria</b>                                                                                                                                                                                                                                                                                     |                                                                                                                                                                                                                                                                                                                                          |                                                                                                                                                                                                                                                                                                                                   |                                                                                                                                                                                                                                                                                                                                   |                                                                                                                                                                                                                                                                                                                                   |
| One or more symptoms of COVID-19 illness<br><br>Laboratory-confirmed SARS-CoV-2 infection<br><br>Has at least one study defined risk factor for severe COVID-19 illness:<br><br>Age≥50 years; hypertension; diabetes; coronary artery disease; chronic lung disease; chronic kidney disease immunosuppression | One or more symptoms of COVID-19 illness<br><br>Laboratory-confirmed SARS-CoV-2 infection<br><br>Has at least one study defined risk factor for severe COVID-19 illness:<br><br><b>Study defined risk factors initially include:</b> age≥50 years; hypertension; diabetes; coronary artery disease; chronic lung disease; chronic kidney | One or more symptoms of COVID-19 illness<br><br>Laboratory-confirmed SARS-CoV-2 infection<br><br>Has at least one study defined risk factor for severe COVID-19 illness:<br><br>Study defined risk factors initially include: age≥50 years; hypertension; diabetes; coronary artery disease; chronic lung disease; chronic kidney | One or more symptoms of COVID-19 illness<br><br>Laboratory-confirmed SARS-CoV-2 infection<br><br>Has at least one study defined risk factor for severe COVID-19 illness:<br><br>Study defined risk factors initially include: age≥50 years; hypertension; diabetes; coronary artery disease; chronic lung disease; chronic kidney | One or more symptoms of COVID-19 illness<br><br>Laboratory-confirmed SARS-CoV-2 infection<br><br>Has at least one study defined risk factor for severe COVID-19 illness:<br><br>Study defined risk factors initially include: age≥50 years; hypertension; diabetes; coronary artery disease; chronic lung disease; chronic kidney |

|                                                                                                                                                                                                                                                         |                                                                                                                                                                                                                                                                                                                                                                                                                                                                                                        |                                                                                                                                                                                                                                                                                                                                                                                                                                                                                |                                                                                                                                                                                                                                                                                                                                                                                                                                                                                |                                                                                                                                                                                                                                                                                                                                                                                                                                                                                                                     |
|---------------------------------------------------------------------------------------------------------------------------------------------------------------------------------------------------------------------------------------------------------|--------------------------------------------------------------------------------------------------------------------------------------------------------------------------------------------------------------------------------------------------------------------------------------------------------------------------------------------------------------------------------------------------------------------------------------------------------------------------------------------------------|--------------------------------------------------------------------------------------------------------------------------------------------------------------------------------------------------------------------------------------------------------------------------------------------------------------------------------------------------------------------------------------------------------------------------------------------------------------------------------|--------------------------------------------------------------------------------------------------------------------------------------------------------------------------------------------------------------------------------------------------------------------------------------------------------------------------------------------------------------------------------------------------------------------------------------------------------------------------------|---------------------------------------------------------------------------------------------------------------------------------------------------------------------------------------------------------------------------------------------------------------------------------------------------------------------------------------------------------------------------------------------------------------------------------------------------------------------------------------------------------------------|
| <p>Clinical team deems stable for outpatient management without supplemental oxygen</p> <p>ABO-compatible CP available at the site at the time of enrollment</p> <p>Duration of symptoms ≤ 7 days at ED presentation</p> <p>Signed informed consent</p> | <p>disease; immunosuppression; <b>sickle cell disease</b>, and <b>obesity (body mass index [BMI]&gt;30)</b> and are <b>updated as needed in the C3PO Manual of Procedures in response to changes in CDC guidance or other information.</b></p> <p>Clinical team deems stable for outpatient management without supplemental oxygen</p> <p>ABO-compatible CP available at the site at the time of enrollment</p> <p>Duration of symptoms ≤ 7 days at ED presentation</p> <p>Signed informed consent</p> | <p>disease; immunosuppression; sickle cell disease, and obesity (body mass index [BMI]≥30) and are updated as needed in the C3PO Manual of Procedures in response to changes in CDC guidance or other information.</p> <p>Clinical team deems stable for outpatient management without supplemental oxygen</p> <p>ABO-compatible CP available at the site at the time of enrollment</p> <p>Duration of symptoms ≤ 7 days at ED presentation</p> <p>Signed informed consent</p> | <p>disease; immunosuppression; sickle cell disease, and obesity (body mass index [BMI]≥30) and are updated as needed in the C3PO Manual of Procedures in response to changes in CDC guidance or other information.</p> <p>Clinical team deems stable for outpatient management without supplemental oxygen</p> <p>ABO-compatible CP available at the site at the time of enrollment</p> <p>Duration of symptoms ≤ 7 days at ED presentation</p> <p>Signed informed consent</p> | <p>disease; immunosuppression; sickle cell disease, and obesity (body mass index [BMI]≥30) and are updated as needed in the C3PO Manual of Procedures in response to changes in CDC guidance or other information.</p> <p>Clinical team deems stable for outpatient management without <b>new</b> supplemental oxygen</p> <p>ABO-compatible CP available at the site at the time of enrollment</p> <p>Duration of symptoms ≤ 7 days at ED presentation <b>and randomization.</b></p> <p>Signed informed consent</p> |
|---------------------------------------------------------------------------------------------------------------------------------------------------------------------------------------------------------------------------------------------------------|--------------------------------------------------------------------------------------------------------------------------------------------------------------------------------------------------------------------------------------------------------------------------------------------------------------------------------------------------------------------------------------------------------------------------------------------------------------------------------------------------------|--------------------------------------------------------------------------------------------------------------------------------------------------------------------------------------------------------------------------------------------------------------------------------------------------------------------------------------------------------------------------------------------------------------------------------------------------------------------------------|--------------------------------------------------------------------------------------------------------------------------------------------------------------------------------------------------------------------------------------------------------------------------------------------------------------------------------------------------------------------------------------------------------------------------------------------------------------------------------|---------------------------------------------------------------------------------------------------------------------------------------------------------------------------------------------------------------------------------------------------------------------------------------------------------------------------------------------------------------------------------------------------------------------------------------------------------------------------------------------------------------------|

**Exclusion Criteria**

|                                                                                                                                                                                                                                                                                                                                                                                                    |                                                                                                                                                                                                                                                                                                                                                                                                                 |                                                                                                                                                                                                                                                                                                                                                                                                          |                                                                                                                                                                                                                                                                                                                                                                                                          |                                                                                                                                                                                                                                                                                                                                                                                                                                                                                       |
|----------------------------------------------------------------------------------------------------------------------------------------------------------------------------------------------------------------------------------------------------------------------------------------------------------------------------------------------------------------------------------------------------|-----------------------------------------------------------------------------------------------------------------------------------------------------------------------------------------------------------------------------------------------------------------------------------------------------------------------------------------------------------------------------------------------------------------|----------------------------------------------------------------------------------------------------------------------------------------------------------------------------------------------------------------------------------------------------------------------------------------------------------------------------------------------------------------------------------------------------------|----------------------------------------------------------------------------------------------------------------------------------------------------------------------------------------------------------------------------------------------------------------------------------------------------------------------------------------------------------------------------------------------------------|---------------------------------------------------------------------------------------------------------------------------------------------------------------------------------------------------------------------------------------------------------------------------------------------------------------------------------------------------------------------------------------------------------------------------------------------------------------------------------------|
| <p>Age less than 18 years</p> <p>Prisoner or ward of the state</p> <p>Presumed unable to complete follow-up assessments</p> <p>Prior adverse reaction(s) from blood product transfusion</p> <p>Receipt of any blood product within the past 120 days</p> <p>Treating clinical team unwilling to administer 300 ml fluid</p> <p>Enrollment in another interventional trial for COVID-19 illness</p> | <p>Age less than 18 years</p> <p>Prisoner or ward of the state</p> <p>Presumed unable to complete follow-up assessments</p> <p>Prior adverse reaction(s) from blood product transfusion</p> <p>Receipt of any blood product within the past 120 days</p> <p>Treating clinical team unwilling to administer up to <b>250 ml</b> fluid</p> <p>Enrollment in another interventional trial for COVID-19 illness</p> | <p>Age less than 18 years</p> <p>Prisoner or ward of the state</p> <p>Presumed unable to complete follow-up assessments</p> <p>Prior adverse reaction(s) from blood product transfusion</p> <p>Receipt of any blood product within the past 120 days</p> <p>Treating clinical team unwilling to administer up to 250 ml fluid</p> <p>Enrollment in another interventional trial for COVID-19 illness</p> | <p>Age less than 18 years</p> <p>Prisoner or ward of the state</p> <p>Presumed unable to complete follow-up assessments</p> <p>Prior adverse reaction(s) from blood product transfusion</p> <p>Receipt of any blood product within the past 120 days</p> <p>Treating clinical team unwilling to administer up to 250 ml fluid</p> <p>Enrollment in another interventional trial for COVID-19 illness</p> | <p>Age less than 18 years</p> <p>Prisoner or ward of the state</p> <p>Presumed unable to complete follow-up assessments</p> <p>Prior adverse reaction(s) from blood product transfusion</p> <p>Receipt of any blood product within the past 120 days</p> <p>Treating clinical team unwilling to administer up to 250 ml fluid</p> <p>Enrollment in another interventional trial for COVID-19 illness <b>or receipt of other active or passive immunization against SARS-CoV2.</b></p> |
|----------------------------------------------------------------------------------------------------------------------------------------------------------------------------------------------------------------------------------------------------------------------------------------------------------------------------------------------------------------------------------------------------|-----------------------------------------------------------------------------------------------------------------------------------------------------------------------------------------------------------------------------------------------------------------------------------------------------------------------------------------------------------------------------------------------------------------|----------------------------------------------------------------------------------------------------------------------------------------------------------------------------------------------------------------------------------------------------------------------------------------------------------------------------------------------------------------------------------------------------------|----------------------------------------------------------------------------------------------------------------------------------------------------------------------------------------------------------------------------------------------------------------------------------------------------------------------------------------------------------------------------------------------------------|---------------------------------------------------------------------------------------------------------------------------------------------------------------------------------------------------------------------------------------------------------------------------------------------------------------------------------------------------------------------------------------------------------------------------------------------------------------------------------------|



**CDC Defined Risk Factors for Severe COVID-19**

<https://www.cdc.gov/coronavirus/2019-ncov/need-extra-precautions/people-with-medical-conditions.html>

| July 30, 2020                                                                                        | September 11, 2020                                                                            | October 6, 2020                                                                               | December 29, 2020                                                                             | February 22, 2021                                                                             |
|------------------------------------------------------------------------------------------------------|-----------------------------------------------------------------------------------------------|-----------------------------------------------------------------------------------------------|-----------------------------------------------------------------------------------------------|-----------------------------------------------------------------------------------------------|
| Cancer                                                                                               | Cancer                                                                                        | Cancer                                                                                        | Cancer                                                                                        | Cancer                                                                                        |
| Chronic kidney disease                                                                               | Chronic kidney disease                                                                        | Chronic kidney disease                                                                        | Chronic kidney disease                                                                        | Chronic kidney disease                                                                        |
| COPD (chronic obstructive pulmonary disease)                                                         | COPD (chronic obstructive pulmonary disease)                                                  | COPD (chronic obstructive pulmonary disease)                                                  | COPD (chronic obstructive pulmonary disease)                                                  | COPD (chronic obstructive pulmonary disease)                                                  |
|                                                                                                      |                                                                                               |                                                                                               | <b>Down Syndrome</b>                                                                          | Down Syndrome                                                                                 |
|                                                                                                      |                                                                                               | <b>Heart conditions, such as heart failure, coronary artery disease, or cardiomyopathies</b>  | Heart conditions, such as heart failure, coronary artery disease, or cardiomyopathies         | Heart conditions, such as heart failure, coronary artery disease, or cardiomyopathies         |
| <b>Immunocompromised state (weakened immune system) from solid organ transplant</b>                  | Immunocompromised state (weakened immune system) from solid organ transplant                  | Immunocompromised state (weakened immune system) from solid organ transplant                  | Immunocompromised state (weakened immune system) from solid organ transplant                  | Immunocompromised state (weakened immune system) from solid organ transplant                  |
| <b>Obesity (body mass index [BMI] of 30 or higher)</b>                                               | Obesity (body mass index [BMI] of 30 or higher)                                               | Obesity (body mass index [BMI] of 30 kg/m <sup>2</sup> or higher but < 40 kg/m <sup>2</sup> ) | Obesity (body mass index [BMI] of 30 kg/m <sup>2</sup> or higher but < 40 kg/m <sup>2</sup> ) | Obesity (body mass index [BMI] of 30 kg/m <sup>2</sup> or higher but < 40 kg/m <sup>2</sup> ) |
| <b>Serious heart conditions, such as heart failure, coronary artery disease, or cardiomyopathies</b> | Serious heart conditions, such as heart failure, coronary artery disease, or cardiomyopathies |                                                                                               |                                                                                               |                                                                                               |
|                                                                                                      |                                                                                               | <b>Severe Obesity (BMI ≥ 40 kg/m<sup>2</sup>)</b>                                             | Severe Obesity (BMI ≥ 40 kg/m <sup>2</sup> )                                                  | Severe Obesity (BMI ≥ 40 kg/m <sup>2</sup> )                                                  |
|                                                                                                      |                                                                                               |                                                                                               | <b>Pregnancy</b>                                                                              | Pregnancy                                                                                     |
| <b>Sickle cell disease</b>                                                                           | Sickle cell disease                                                                           | Sickle cell disease                                                                           | Sickle cell disease                                                                           | Sickle cell disease                                                                           |
|                                                                                                      |                                                                                               | <b>Smoking</b>                                                                                | Smoking                                                                                       | Smoking                                                                                       |
| <b>Type 2 diabetes mellitus</b>                                                                      | Type 2 diabetes mellitus                                                                      |

## Ordinal Scales for Covid-19 Illness Severity

We quantified the worst illness severity during the 30 days after enrollment using the 8-category COVID Ordinal Scale for Clinical Improvement, as described in the World Health Organization (WHO) COVID-19 Trial Design Draft Master Protocol posted in February 2020. A score of zero, which would correspond to being virus-free, is not possible because we enrolled only patients with confirmed SARS-CoV2 infection.

### **WHO's COVID Ordinal Scale for Clinical Improvement**

- 1 = Not hospitalized without limitation in activity (or limitations with no symptoms)
- 2 = Not hospitalized with limitation in activity (continued symptoms)
- 3 = Hospitalized not on supplemental oxygen
- 4 = Hospitalized on supplemental oxygen by mask or nasal prongs
- 5 = Hospitalized on non-invasive ventilation or high flow nasal cannula
- 6 = Hospitalized, intubated and mechanically ventilated
- 7 = Hospitalized, intubated, mechanically ventilated and requiring additional organ support (pressors, renal replacement therapy)
- 8 = Death

[https://www.who.int/blueprint/priority-diseases/key-action/COVID-19\\_Treatment\\_Trial\\_Design\\_Master\\_Protocol\\_synopsis\\_Final\\_18022020.pdf](https://www.who.int/blueprint/priority-diseases/key-action/COVID-19_Treatment_Trial_Design_Master_Protocol_synopsis_Final_18022020.pdf)

This scale could be calculated from clinical information, but it differs from the 10-level WHO Clinical Progression Scale published in August 2020 after this trial was designed and initiated. (WHO Working Group on the Clinical Characterisation and Management of COVID-19 infection. A minimal common outcome measure set for COVID-19 clinical research. *Lancet Infect Dis* 2020;20(8):e192–7).

We used an adaptation of the WHO Ordinal scale, based on the quality of symptoms reported by the subject, to quantify outpatient disease severity among patients at home (scores 1-2 on the WHO scale). This 5-level COVID Outpatient Ordinal Outcomes scale was adapted for outpatient use based on the work of Harrell 2020 (<http://hbiostat.org/proj/covid19/bayesplan.html>). This scale is hierarchical where 1 is the highest severity (hospitalization) and 5 is the lowest severity.

### **COVID Outpatient Ordinal Outcomes Scale**

- 1 = patient requires care in the hospital
- 2 = patient requires care in the ED or urgent care
- 3 = patient at home with symptoms rated as moderate (defined as fever, shortness of breath, abdominal pain)
- 4 = patient at home with symptoms rated as mild (defined as afebrile, constitutional symptoms (flu-like illness) without shortness of breath)
- 5 = patient in their usual state of health

Worsening of symptoms was defined as any subject admitted to the hospital (level 1), seen in the emergency room (level 2), a patient who reports increased symptoms of 2 levels on the scale over a 24-hour period, or a patient who reports increased symptoms of 1 level over a 48 hour period.

## Serious Adverse Event Reporting

Multiple similar terms might be selected for reporting the progression of respiratory symptoms. To promote consistency, the enrolling sites were encouraged to use this guidance for selecting between these terms.

**ACUTE RESPIRATORY FAILURE:** This term should be utilized for subjects who are either intubated for respiratory failure or receive high flow oxygen supplementation if the etiology of the respiratory failure is unclear or multifactorial. If the etiology is clear for example: Pneumonia, Pulmonary Embolism, etc, use that name instead. Previously, investigators have used the following different terms that are similar to acute respiratory failure: ACUTE RESPIRATORY DISTRESS SYNDROME, ACUTE RESPIRATORY INSUFFICIENCY, RESPIRATORY DISTRESS, HYPOXIC RESPIRATORY FAILURE

**PNEUMONIA:** This term should be utilized for subjects that have clinical evidence of pneumonia. Previously, investigators have used the following different terms that are similar to pneumonia: ACUTE PNEUMONIA, BILATERAL PNEUMONIA, PNEUMONIA, PNEUMONIA DUE TO OTHER VIRUS NOT ELSEWHERE CLASSIFIED, PNEUMONIA VIRAL, VIRAL PNEUMONIA..

**HYPOXIA:** This term should be utilized for participants who have an oxygen saturation of <92% and no clear etiology for the hypoxia has been found. Previously, investigators have used the following different terms that are similar to hypoxia: HYPOXEMIA, HYPOXIA, OXIMETRY DECREASED, OXYGEN SATURATION DECREASED.

**DYSPNEA:** This term should be utilized for participants who have shortness of breath without a clear, more specific etiology and no hypoxia. Previously, investigators have used the following different terms that are similar to dyspnea: INCREASED SHORTNESS OF BREATH, SHORTNESS OF BREATH, SOB (SHORTNESS OF BREATH)

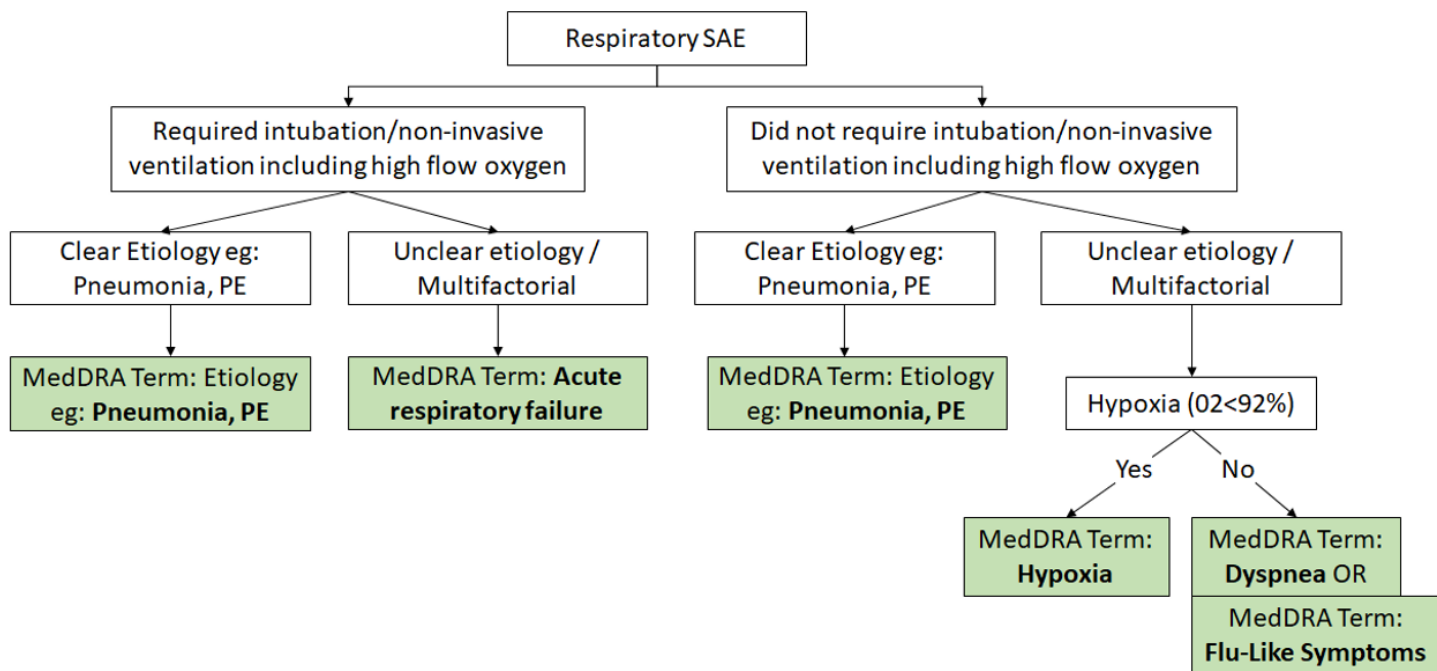

## Supplemental Tables and Figures

A. Distribution of Donor Titers and Patients with Disease Progression

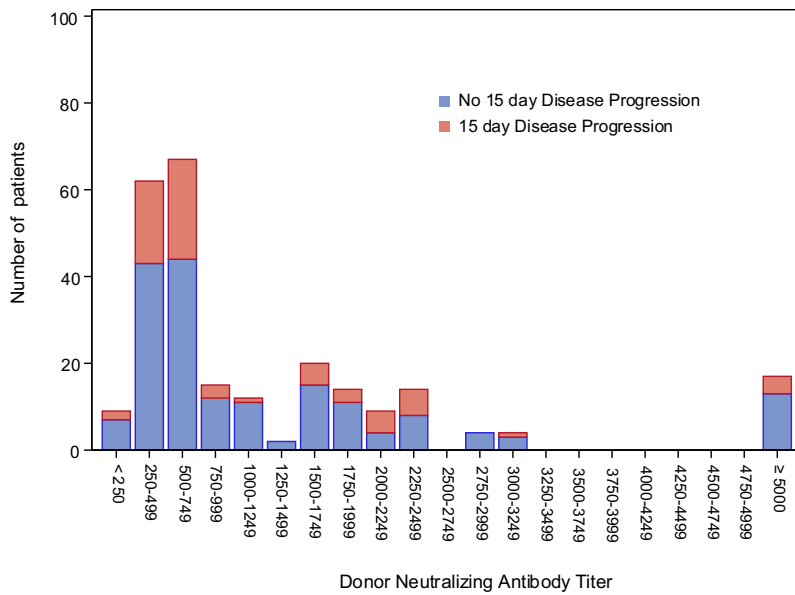

B. Regression of Donor Titers to Probability of Disease Progression

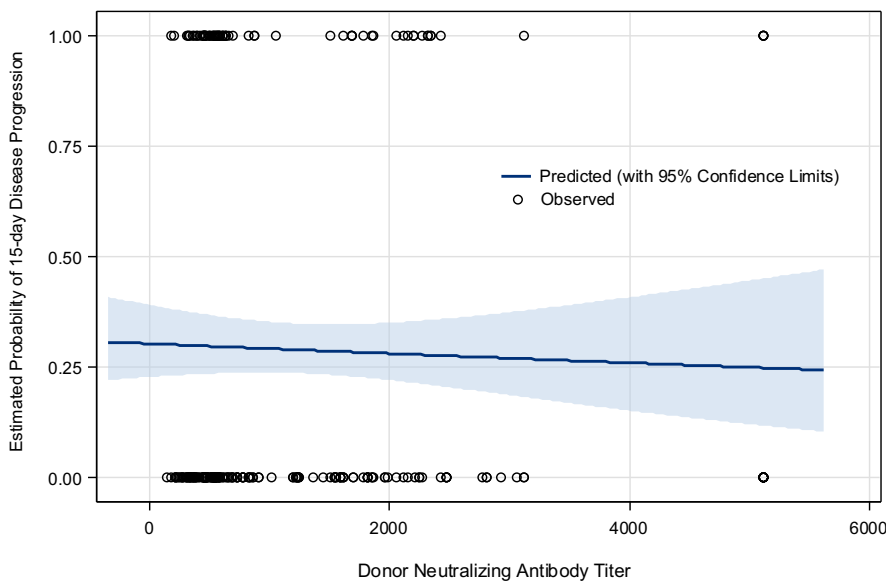

**Figure S1. Distribution of donor CCP neutralizing antibody titers and association with disease progression**

(A) Number of patients who received Covid-19 Convalescent Plasma (CCP) with donor neutralizing antibody titers within each specified range among patients with (red bars) or without (blue bars) progression of disease within 15 days of randomization. (B) Logistic regression model to examine the relationship between donor neutralizing antibody titers and the primary outcome of 15-day disease progression. The blue line indicates the predicted probability of disease progression (on the vertical axis) across the range of donor neutralizing antibody titers (on the horizontal axis), with the pale blue area indicating the 95% confidence limits. The small black circles indicate the observed data for each patient, either at 0.00 on the vertical axis (for those who did not have disease progression) or at 1.00 on the vertical axis (for those who did have disease progression). The probability of disease progression (y-axis) does not change as the titers (axis) increase, odds ratio (95% confidence interval): 1 (0.9997, 1.0002).

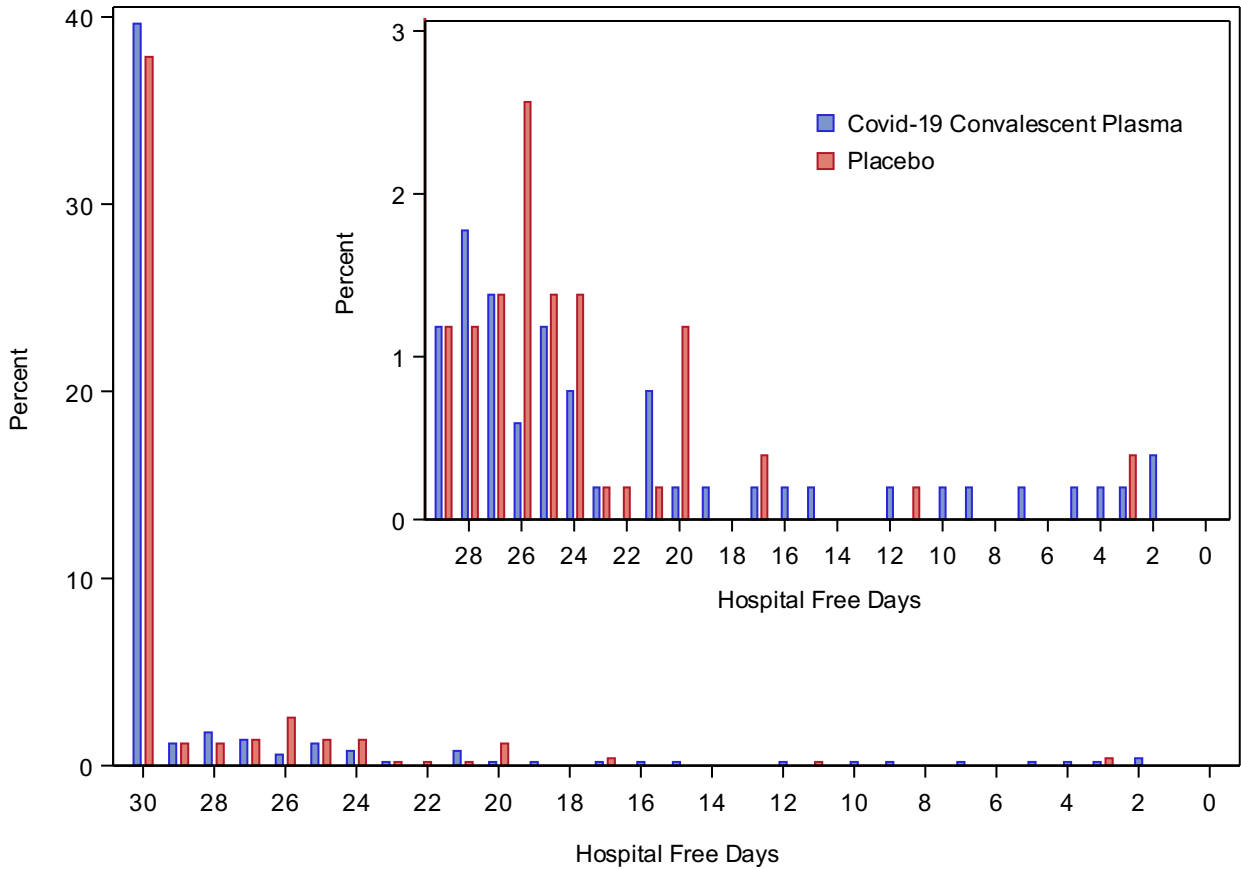

**Figure S2. Secondary Efficacy Outcome - Hospital Free Days by Treatment Group**

Distribution by treatment group of the number of hospital-free days among living patients within the 30-day study period. Inset shows a detailed view of distribution of hospital free days without the 30 hospital free days bar. Blue bars indicate percent of patients among those allocated to Covid-19 Convalescent Plasma. Red bars indicate patients allocated to placebo.

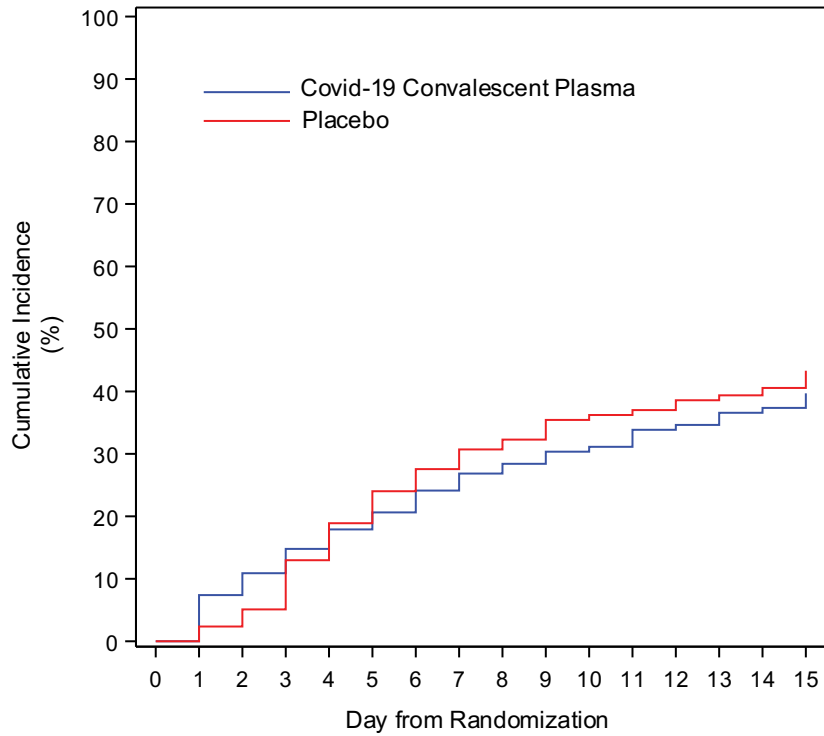

|                 |     |     |     |     |     |     |     |     |     |     |     |     |     |     |     |     |
|-----------------|-----|-----|-----|-----|-----|-----|-----|-----|-----|-----|-----|-----|-----|-----|-----|-----|
| CCP at risk     | 257 | 238 | 229 | 219 | 211 | 204 | 195 | 188 | 184 | 179 | 177 | 170 | 168 | 163 | 161 | 155 |
| Placebo at risk | 254 | 248 | 241 | 221 | 206 | 193 | 184 | 176 | 172 | 164 | 162 | 160 | 156 | 154 | 151 | 144 |

**Figure S3. Secondary Efficacy Outcome - Time to Worsening of Symptoms**

Cumulative incidence of symptom worsening within 15-days after randomization. Symptom worsening was defined using the 5-category ordinal scale or return for medical care. The blue line indicates CCP, and the red line indicates placebo. CCP = Covid-19 convalescent plasma.

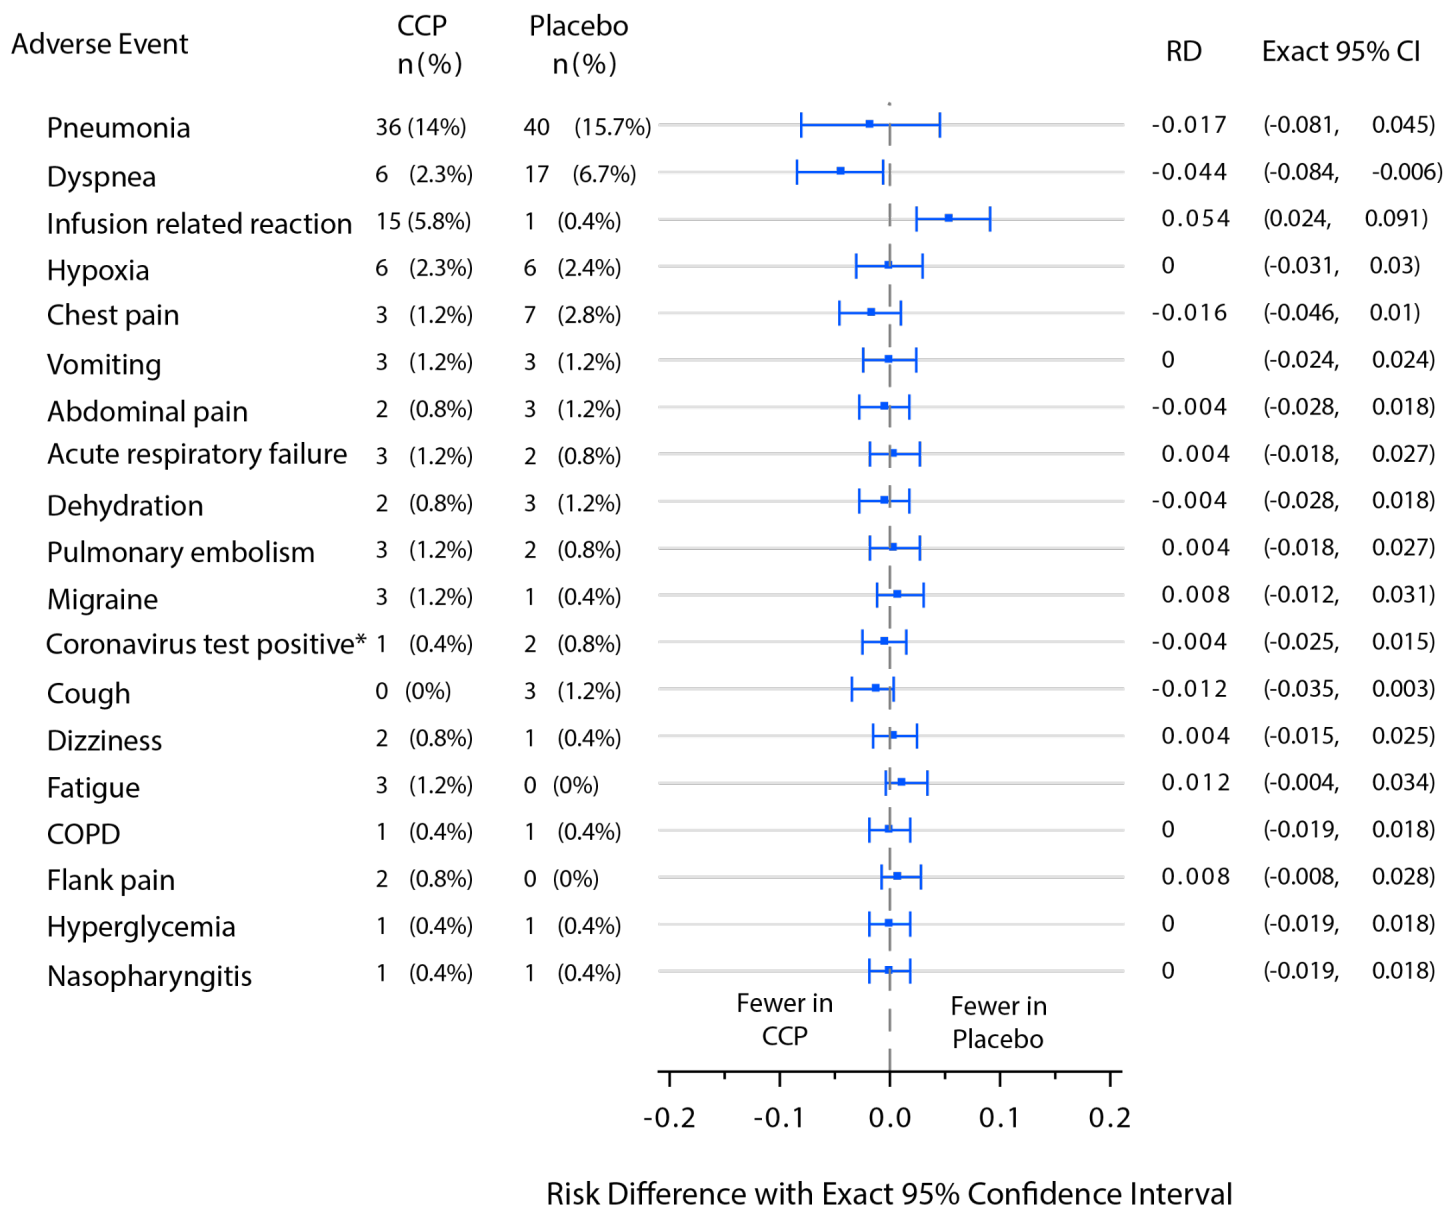

**Figure S4. Adverse events, both serious and non-serious, occurring in ≥2 subjects - by treatment group**

All adverse events, both serious and non-serious, occurring in 2 or more subjects listed by MedDRA preferred term or grouped similar preferred terms. Sixteen adverse events classified as “infusion related reactions” were definitely or possibly related to the study intervention. No other adverse events were classified as related to study intervention.

\* “Coronavirus test positive” refers to patients who had a repeat visit to the emergency department post randomization for coronavirus testing (for example as a prerequisite for returning to work).

CCP = Covid-19 convalescent plasma, RD = Risk difference, CI = Confidence interval, COPD = Chronic obstructive pulmonary disease



**Table S1. Source of CCP Donations**

| <b>Region</b> | <b>Number of donors</b> | <b>Dates of donation</b> |
|---------------|-------------------------|--------------------------|
| Chicago       | 140                     | 6/27/2020 - 8/8/2020     |
| Denver        | 98                      | 7/27/2020 - 8/31/2020    |
| Phoenix       | 4                       | 9/18/2020 - 10/7/2020    |
| Pittsburgh    | 7                       | 5/7/2020 - 6/8/2002      |

**Table S2. Post-hoc Sensitivity Analyses Investigating 25 Patients Admitted During the Index Visit**

|                                                                         | <b>Covid-19<br/>Convalescent<br/>Plasma</b> | <b>Placebo</b> |
|-------------------------------------------------------------------------|---------------------------------------------|----------------|
| <b>Sensitivity analysis</b>                                             |                                             |                |
| Intention to treat population, n                                        | 257                                         | 254            |
| Patients Admitted During the Index Visit, n (%)                         | 19 (7%)                                     | 6 (2%)         |
| Primary outcome after exclusion, n (%)                                  | 58 (24%)                                    | 75 (30%)       |
| Risk difference after exclusion, risk difference (credible interval)    | 5.8% (-1.9% to 13.6%)                       |                |
| Posterior Probability that CCP was superior                             | 0.93                                        |                |
| Per protocol population (n)                                             | 246                                         | 251            |
| Patients Admitted During the Index Visit, n (%)                         | 16 (7%)                                     | 6 (2%)         |
| Primary outcome after exclusion, n (%)                                  | 55 (24%)                                    | 74 (30%)       |
| Risk difference after exclusion, risk difference (credible interval)    | 6.2% (-1.7% to 14.1%)                       |                |
| Posterior Probability that CCP was superior                             | 0.94                                        |                |
| <b>Patient characteristics of those admitted during the index visit</b> |                                             |                |
| Reason for early admission                                              |                                             |                |
| Pneumonia or hypoxia, n                                                 | 12                                          | 4              |
| Infusion related reaction, n                                            | 3                                           | 0              |
| Other. N                                                                | 4                                           | 2              |
| Infusion never initiated, n                                             | 2                                           | 0              |
| Randomization to infusion start - median minutes (IQR)                  | 113 (89 to 154)                             | 24 (23 to 94)  |
| Hospital length of stay - median days (IQR)                             | 4 (2 to 6)                                  | 5 (3 to 8)     |

IQR = interquartile range

**Table S3. Characteristics of 6 Patients Who Died Within 30 Days from Randomization**

| Age<br>yr | Gender | Treatment<br>Group | Eligibility<br>Risk<br>Factors<br>n | Name of<br>Fatal<br>Adverse<br>Event | Time interval - days                             |                                            |                           |
|-----------|--------|--------------------|-------------------------------------|--------------------------------------|--------------------------------------------------|--------------------------------------------|---------------------------|
|           |        |                    |                                     |                                      | Symptom<br>Duration<br>Prior to<br>Randomization | Randomization<br>to Disease<br>Progression | Randomization<br>to Death |
| 72        | Male   | CCP                | 2                                   | Pneumonia                            | 3                                                | 2                                          | 27                        |
| 49        | Female | CCP                | 3                                   | Pulmonary<br>embolism                | 6                                                | 7                                          | 7                         |
| 55        | Female | CCP                | 4                                   | Acute<br>respiratory<br>failure      | 2                                                | 10                                         | 10                        |
| 55        | Male   | CCP                | 7                                   | Pneumonia                            | 6                                                | 0                                          | 23                        |
| 75        | Female | CCP                | 5                                   | Hypoxia                              | 3                                                | 1                                          | 17                        |
| 87        | Male   | Placebo            | 2                                   | Pneumonia                            | 1                                                | 3                                          | 5                         |

No deaths were classified as related to study intervention. Adverse events represent the name assigned to the event at its onset.

CCP = Covid-19 Convalescent Plasma

yr = years

**Table S4. Adverse events, both serious and non-serious, occurring in only 1 subject listed by treatment group, n=1 (0.4%)**

**MedDRA Preferred Terms**

| <b>Covid-19 Convalescent Plasma</b> | <b>Placebo</b>               |
|-------------------------------------|------------------------------|
| Acute kidney injury                 | Anemia                       |
| Alcohol poisoning                   | Decreased appetite           |
| Anaphylactic reaction               | End stage renal disease*     |
| Anxiety                             | Esophagoscopy                |
| Asthma                              | Hemoptysis                   |
| Atrial fibrillation                 | Hyperkalemia                 |
| Bronchospasm                        | Hyponatremia                 |
| Depression                          | Iliac artery occlusion       |
| Dysphagia                           | Influenza like illness       |
| Ecchymosis                          | Paranoia                     |
| Epilepsy                            | Presyncope                   |
| Epistaxis                           | Psychotic disorder           |
| Fall                                | Septic shock                 |
| Hypotension                         | Tachycardia                  |
| Infusion site extravasation         | Thrombophlebitis superficial |
| Nephrolithiasis                     | Venous thrombosis limb       |
| Pyrexia                             |                              |
| Rash                                |                              |
| Road traffic accident               |                              |
| Sinusitis                           |                              |
| Tooth abscess                       |                              |
| Tooth extraction                    |                              |
| Vertigo                             |                              |
| Viral diarrhea                      |                              |

\* Patient with end-stage renal disease could not receive hemodialysis as an outpatient due to having Covid-19 and was admitted for dialysis.
