# Supplementary material
Source: PubMed Central journal article supplement (PMC8385553)
Supplement: NEJMoa2103784_data-sharing.pdf [file NEJMoa2103784_data-sharing.pdf]

## Data Sharing Statement

Korley FK, Durkalski-Mauldin V, Yeatts SD, et al. Early Convalescent Plasma for High-Risk Outpatients with Covid-19. N Engl J Med. DOI: 10.1056/NEJMoa2103784.

| Question                                                            | Authors' Response                                                                                                      |
|---------------------------------------------------------------------|------------------------------------------------------------------------------------------------------------------------|
| Will the data collected for your study be made available to others? | Yes                                                                                                                    |
| Would you like to offer context for your decision?                  | —                                                                                                                      |
| Which data?                                                         | Complete de-identified patient data set                                                                                |
| Additional information about data                                   | —                                                                                                                      |
| How or where can the data be obtained?                              | NHLBI Biodata Catalyst:<br><a href="https://biodatacatalyst.nhlbi.nih.gov/">https://biodatacatalyst.nhlbi.nih.gov/</a> |
| When will data availability begin?                                  | 09/21/2021                                                                                                             |
| When will data availability end?                                    | —                                                                                                                      |
| Will any supporting documents be available?                         | —                                                                                                                      |
| Which supporting documents?                                         | —                                                                                                                      |
| Additional information about supporting documents                   | —                                                                                                                      |
| How or where can supporting documents be obtained?                  | —                                                                                                                      |
| When will supporting documents availability begin?                  | —                                                                                                                      |
| When will supporting documents availability end?                    | —                                                                                                                      |
| To whom will data be available?                                     | —                                                                                                                      |
| For what type of analysis or purpose?                               | —                                                                                                                      |
| By what mechanism?                                                  | —                                                                                                                      |
| Any other restrictions?                                             | —                                                                                                                      |
| Additional information                                              | —                                                                                                                      |

This statement was posted on August 18, 2021, at NEJM.org.
