# Supplementary material
Source: PubMed Central journal article supplement (PMC8385553)
Supplement: NEJMoa2103784_disclosures.pdf [file NEJMoa2103784_disclosures.pdf]

Disclosure Purpose: 21-03784

Summary of Interests

**Company or Organization**

| Entity                                                                                                                       | Type             | Interest Held By                                                                |
|------------------------------------------------------------------------------------------------------------------------------|------------------|---------------------------------------------------------------------------------|
| National Institutes of Health                                                                                                | Grant / Contract | Self                                                                            |
| <i>Recipient Name:</i> University of Michigan<br><i>Grant / Contract Description:</i> U 01<br><i>Additional Information:</i> |                  | <i>Recipient Type:</i> Institution<br><i>Grant / Contract Purpose:</i> Research |

Additional Questions:

- Are there other relationships or activities that readers could perceive to have influenced, or that give the appearance of potentially influencing, what you wrote in the submitted work?**  
No.
- What is the manuscript title?**  
Early Convalescent Plasma for High-Risk Outpatients with Covid-19
- Are you the corresponding author?**  
No.

Certification

I certify that the information provided in this disclosure is complete and accurate.

**Disclosure Purpose:** 21-03784

**Summary of Interests**

I do not have any interests to disclose at this time.

**Additional Questions:**

- 1. **Are there other relationships or activities that readers could perceive to have influenced, or that give the appearance of potentially influencing, what you wrote in the submitted work?**  
No.
- 2. **What is the manuscript title?**  
Early Convalescent Plasma for High Risk Patients with COVID-19
- 3. **Are you the corresponding author?**  
No.

**Certification**

I certify that the information provided in this disclosure is complete and accurate.

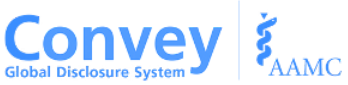

Disclosure Purpose: 21-03784

Summary of Interests

I do not have any interests to disclose at this time.

Additional Questions:

- 1. **Are there other relationships or activities that readers could perceive to have influenced, or that give the appearance of potentially influencing, what you wrote in the submitted work?**  
No.
- 2. **What is the manuscript title?**  
Early convalescent plasma for high risk out patients with COVID-19
- 3. **Are you the corresponding author?**  
No.

Certification

I certify that the information provided in this disclosure is complete and accurate.



Disclosure Purpose: 21-03784

## Summary of Interests

### Company or Organization

| Entity                                                                                                                                                                                                                                       | Type             | Interest Held By                                                                |
|----------------------------------------------------------------------------------------------------------------------------------------------------------------------------------------------------------------------------------------------|------------------|---------------------------------------------------------------------------------|
| <a href="#">Biomedical Advanced Research and Development Authority</a>                                                                                                                                                                       | Grant / Contract | Other - Grant to Vitalant                                                       |
| <i>Recipient Name:</i> Vitalant Research Institute<br><i>Grant / Contract Description:</i> 75A50120C00094<br><i>Additional Information:</i> Provide material support to research                                                             |                  | <i>Recipient Type:</i> Institution<br><i>Grant / Contract Purpose:</i> Research |
| <a href="#">National Heart, Lung, and Blood Institute</a>                                                                                                                                                                                    | Grant / Contract | Self                                                                            |
| <i>Recipient Name:</i> University of Pittsburgh<br><i>Grant / Contract Description:</i> 10T2HL156812-01<br><i>Additional Information:</i>                                                                                                    |                  | <i>Recipient Type:</i> Institution<br><i>Grant / Contract Purpose:</i> Research |
| <a href="#">National Institute of Neurological Disorders and Stroke</a>                                                                                                                                                                      | Grant / Contract | Self                                                                            |
| <i>Recipient Name:</i> University of Michigan and Medical University of South Carolina<br><i>Grant / Contract Description:</i> U24NS100659 and U24NS100655<br><i>Additional Information:</i> Infrastructure for SIREN clinical trial network |                  | <i>Recipient Type:</i> Institution<br><i>Grant / Contract Purpose:</i> Research |

### Intellectual Property

| Type                                                                                                                                                                                | Is Licensed | Interest Held By                                                                                                                                  |
|-------------------------------------------------------------------------------------------------------------------------------------------------------------------------------------|-------------|---------------------------------------------------------------------------------------------------------------------------------------------------|
| <a href="#">Patent - Methods and devices to guide therapy for ventric ...</a>                                                                                                       | No          | Self                                                                                                                                              |
| <i>Description:</i> Methods and devices to guide therapy for ventricular fibrillation based on waveform analysis and sur<br><i>Patent Holder:</i> Discloser<br><i>Licensees:</i>    |             | <i>Patent Number:</i> US7269454B2<br><i>Patent Status:</i> Issued<br><i>Filing Jurisdiction:</i> USA<br><i>Additional Information:</i>            |
| <a href="#">Patent - Method and apparatus employing a scaling exponen ...</a>                                                                                                       | No          | Self                                                                                                                                              |
| <i>Description:</i> Method and apparatus employing a scaling exponent for selectively defibrillating a patient<br><i>Patent Holder:</i> Current Institution<br><i>Licensees:</i>    |             | <i>Patent Number:</i> US6438419B1<br><i>Patent Status:</i> Issued<br><i>Filing Jurisdiction:</i> USA<br><i>Additional Information:</i> No revenue |
| <a href="#">Patent - Electrocardiographic identification of non-st el ...</a>                                                                                                       | No          | Self                                                                                                                                              |
| <i>Description:</i> Electrocardiographic identification of non-st elevation ischemic events<br><i>Patent Status:</i> Issued<br><i>Filing Jurisdiction:</i> USA<br><i>Licensees:</i> |             | <i>Patent Number:</i> WO2016168181A1<br><i>Patent Holder:</i> Current Institution<br><i>Additional Information:</i> No revenue                    |

### Additional Questions:

1. **Are there other relationships or activities that readers could perceive to have influenced, or that give the appearance of potentially influencing, what you wrote in the submitted work?**

No.

2. **What is the manuscript title?**

Early Convalescent Plasma for High Risk Outpatients with Covid-19

3. **Are you the corresponding author?**

Yes.

a. **Please list the other authors' names here.**

Frederick K. Korley, MD, PhD, University of Michigan Valerie Durkalski-Mauldin, PhD, Medical University of South Carolina Sharon D. Yeatts, PhD, Medical University of South Carolina Kevin Schulman, MD, MBA, Stanford University Robertson D. Davenport, MD, University of Michigan Larry J. Dumont, MBA, PhD, Vitalant Research Institute Nahed El Kassir, MD, PhD, National Heart Lung and Blood Institute Lydia D. Foster, MS, Medical University of South Carolina Jennifer M. Hah, MD, Stanford University Siddhartha Jaiswal, MD, PhD, Stanford University Alesia Kaplan, MD, University of Pittsburgh Ezekiel Lowell, BS, Medical University of South Carolina John F. McDyer, MD, University of Pittsburgh James Quinn, MD, Stanford University Darrell J. Triulzi, MD, University of Pittsburgh Carol Van Huysen, BS, University of Michigan Valerie LW Stevenson, BAS, RRT, University of Michigan Kabir Yadav, MDCM, MS, MSHS, Harbor-UCLA Medical Center Christopher W. Jones, MD, Cooper University Hospital Bory Kea, MD, Oregon Health and Science University Aaron Burnett, MD, Health Partners Methodist Hospital Joshua C.

Reynolds, MD, MS, Spectrum Health; Michigan State University Colin F. Greineder, MD, PhD, University of Michigan Nathan L. Haas, MD, University of Michigan David G. Beiser, MD, University of Chicago Robert Silbergleit, MD, University of Michigan William Barsan, MD, University of Michigan

#### Certification

I certify that the information provided in this disclosure is complete and accurate.

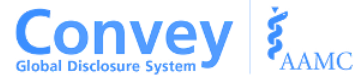

**Disclosure Purpose:** 21-03784

## Summary of Interests

I do not have any interests to disclose at this time.

## Additional Questions:

- Are there other relationships or activities that readers could perceive to have influenced, or that give the appearance of potentially influencing, what you wrote in the submitted work?**  
No.
- What is the manuscript title?**  
Early Convalescent Plasma for High Risk Outpatients with Covid-19
- Are you the corresponding author?**  
No.

## Certification

I certify that the information provided in this disclosure is complete and accurate.

**Disclosure Purpose:** 21-03784

**Summary of Interests**

I do not have any interests to disclose at this time.

**Additional Questions:**

- 1. **Are there other relationships or activities that readers could perceive to have influenced, or that give the appearance of potentially influencing, what you wrote in the submitted work?**  
No.
- 2. **What is the manuscript title?**  
Early Convalescent Plasma for High Risk outpatients with Covid-19
- 3. **Are you the corresponding author?**  
No.

**Certification**

I certify that the information provided in this disclosure is complete and accurate.

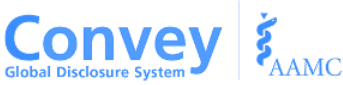

**Disclosure Purpose:** 21-03784

### Summary of Interests

I do not have any interests to disclose at this time.

### Additional Questions:

- Are there other relationships or activities that readers could perceive to have influenced, or that give the appearance of potentially influencing, what you wrote in the submitted work?**  
No.
- What is the manuscript title?**  
Early Convalescent Plasma for High Risk Outpatients with Covid-19
- Are you the corresponding author?**  
No.

### Certification

I certify that the information provided in this disclosure is complete and accurate.



**Disclosure Purpose:** 21-03784

**Summary of Interests**

I do not have any interests to disclose at this time.

**Additional Questions:**

- 1. **Are there other relationships or activities that readers could perceive to have influenced, or that give the appearance of potentially influencing, what you wrote in the submitted work?**  
No.
- 2. **What is the manuscript title?**  
Early Convalescent Plasma for High Risk Outpatients with Covid-19
- 3. **Are you the corresponding author?**  
No.

**Certification**

I certify that the information provided in this disclosure is complete and accurate.

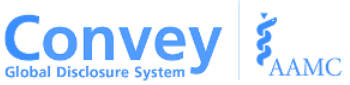

Disclosure Purpose: 21-03784

Summary of Interests

I do not have any interests to disclose at this time.

Additional Questions:

- 1. **Are there other relationships or activities that readers could perceive to have influenced, or that give the appearance of potentially influencing, what you wrote in the submitted work?**  
No.
- 2. **What is the manuscript title?**  
Early Convalescent Plasma for High Risk Outpatients with Covid-19
- 3. **Are you the corresponding author?**  
No.

Certification

I certify that the information provided in this disclosure is complete and accurate.

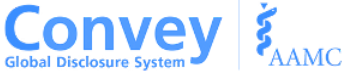

**Disclosure Purpose:** 21-03784

**Summary of Interests**

I do not have any interests to disclose at this time.

**Additional Questions:**

- 1. **Are there other relationships or activities that readers could perceive to have influenced, or that give the appearance of potentially influencing, what you wrote in the submitted work?**  
No.
- 2. **What is the manuscript title?**  
Early Convalescent Plasma for High Risk Outpatients with Covid-19
- 3. **Are you the corresponding author?**  
No.

**Certification**

I certify that the information provided in this disclosure is complete and accurate.



**Disclosure Purpose:** 21-03784

**Summary of Interests**

I do not have any interests to disclose at this time.

**Additional Questions:**

- 1. **Are there other relationships or activities that readers could perceive to have influenced, or that give the appearance of potentially influencing, what you wrote in the submitted work?**  
No.
- 2. **What is the manuscript title?**  
Early Convalescent Plasma for High Risk Outpatients with Covid-19
- 3. **Are you the corresponding author?**  
No.

**Certification**

I certify that the information provided in this disclosure is complete and accurate.



**Disclosure Purpose:** 21-03784

**Summary of Interests**

I do not have any interests to disclose at this time.

**Additional Questions:**

- 1. **Are there other relationships or activities that readers could perceive to have influenced, or that give the appearance of potentially influencing, what you wrote in the submitted work?**  
No.
- 2. **What is the manuscript title?**  
Early Convalescent Plasma for High Risk Outpatients with Covid-19
- 3. **Are you the corresponding author?**  
No.

**Certification**

I certify that the information provided in this disclosure is complete and accurate.

Disclosure Purpose: 21-03784

Summary of Interests

| Company or Organization                                       |            |                                                                                               |
|---------------------------------------------------------------|------------|-----------------------------------------------------------------------------------------------|
| Entity                                                        | Type       | Interest Held By                                                                              |
| <a href="#">AVRO Bio</a>                                      | Consultant | Self                                                                                          |
| <i>Category:</i> Consultant<br><i>Additional Information:</i> |            | <i>Description:</i> Consultant for AVRO for research related to clonal hematopoiesis          |
| <a href="#">Foresite Labs</a>                                 | Consultant | Self                                                                                          |
| <i>Category:</i> Consultant<br><i>Additional Information:</i> |            | <i>Description:</i> Consultant for Foresite Labs for research related to clonal hematopoiesis |
| <a href="#">Genentech</a>                                     | Consultant | Self                                                                                          |
| <i>Category:</i> Consultant<br><i>Additional Information:</i> |            | <i>Description:</i> Consultant for Genentech for research related to clonal hematopoiesis     |
| <a href="#">Novartis</a>                                      | Consultant | Self                                                                                          |
| <i>Category:</i> Consultant<br><i>Additional Information:</i> |            | <i>Description:</i> Consultant for Novartis for research related to clonal hematopoiesis      |

Additional Questions:

1. **Are there other relationships or activities that readers could perceive to have influenced, or that give the appearance of potentially influencing, what you wrote in the submitted work?**  
No.
2. **What is the manuscript title?**  
Early Convalescent Plasma for High Risk Outpatients with Covid-19
3. **Are you the corresponding author?**  
No.

Certification

I certify that the information provided in this disclosure is complete and accurate.

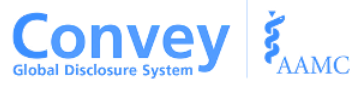

**Disclosure Purpose:** 21-03784

## Summary of Interests

| Company or Organization                                                                                                                                                                              |                  |                                                                                 |
|------------------------------------------------------------------------------------------------------------------------------------------------------------------------------------------------------|------------------|---------------------------------------------------------------------------------|
| Entity                                                                                                                                                                                               | Type             | Interest Held By                                                                |
| <a href="#">AstraZeneca</a>                                                                                                                                                                          | Grant / Contract | Self                                                                            |
| <i>Recipient Name:</i> Cooper University Healthcare<br><i>Grant / Contract Description:</i> Research study testing anti-platelet agents in acute coronary syndrome<br><i>Additional Information:</i> |                  | <i>Recipient Type:</i> Institution<br><i>Grant / Contract Purpose:</i> Research |
| <a href="#">Janssen Biotech, Inc.</a>                                                                                                                                                                | Grant / Contract | Self                                                                            |
| <i>Recipient Name:</i> Cooper University Healthcare<br><i>Grant / Contract Description:</i> Clinical trial involving patients with pulmonary embolism<br><i>Additional Information:</i>              |                  | <i>Recipient Type:</i> Institution<br><i>Grant / Contract Purpose:</i> Research |
| <a href="#">Vapotherm Inc</a>                                                                                                                                                                        | Grant / Contract | Self                                                                            |
| <i>Recipient Name:</i> Cooper University Healthcare<br><i>Grant / Contract Description:</i> Clinical trial involving patients with COPD<br><i>Additional Information:</i>                            |                  | <i>Recipient Type:</i> Institution<br><i>Grant / Contract Purpose:</i> Research |

## Additional Questions:

- Are there other relationships or activities that readers could perceive to have influenced, or that give the appearance of potentially influencing, what you wrote in the submitted work?**  
No.
- What is the manuscript title?**  
Early Convalescent Plasma for High Risk Outpatients with Covid-19
- Are you the corresponding author?**  
No.

## Certification

I certify that the information provided in this disclosure is complete and accurate.

**Disclosure Purpose:** 21-03784

**Summary of Interests**

I do not have any interests to disclose at this time.

**Additional Questions:**

- 1. **Are there other relationships or activities that readers could perceive to have influenced, or that give the appearance of potentially influencing, what you wrote in the submitted work?**  
No.
- 2. **What is the manuscript title?**  
Early Convalescent plasma for high risk outpatients with COVID-19
- 3. **Are you the corresponding author?**  
No.

**Certification**

I certify that the information provided in this disclosure is complete and accurate.



**Disclosure Purpose:** 21-03784

**Summary of Interests**

I do not have any interests to disclose at this time.

**Additional Questions:**

- 1. **Are there other relationships or activities that readers could perceive to have influenced, or that give the appearance of potentially influencing, what you wrote in the submitted work?**  
No.
- 2. **What is the manuscript title?**  
Early Convalescent Plasma for High Risk Outpatients with Covid-19
- 3. **Are you the corresponding author?**  
No.

**Certification**

I certify that the information provided in this disclosure is complete and accurate.



**Disclosure Purpose:** 21-03784

**Summary of Interests**

I do not have any interests to disclose at this time.

**Additional Questions:**

- 1. **Are there other relationships or activities that readers could perceive to have influenced, or that give the appearance of potentially influencing, what you wrote in the submitted work?**  
No.
- 2. **What is the manuscript title?**  
Early Convalescent Plasma for High Risk Outpatients with Covid-19
- 3. **Are you the corresponding author?**  
No.

**Certification**

I certify that the information provided in this disclosure is complete and accurate.



**Disclosure Purpose:** 21-03784

**Summary of Interests**

I do not have any interests to disclose at this time.

**Additional Questions:**

- 1. **Are there other relationships or activities that readers could perceive to have influenced, or that give the appearance of potentially influencing, what you wrote in the submitted work?**  
No.
- 2. **What is the manuscript title?**  
Early Convalescent Plasma for High Risk Outpatients with Covid-19
- 3. **Are you the corresponding author?**  
No.

**Certification**

I certify that the information provided in this disclosure is complete and accurate.



**Disclosure Purpose:** 21-03784

Summary of Interests

I do not have any interests to disclose at this time.

Additional Questions:

- 1. **Are there other relationships or activities that readers could perceive to have influenced, or that give the appearance of potentially influencing, what you wrote in the submitted work?**  
No.
- 2. **What is the manuscript title?**  
Early Convalescent Plasma for High Risk Outpatients with Covid-19
- 3. **Are you the corresponding author?**  
No.

Certification

I certify that the information provided in this disclosure is complete and accurate.



**Disclosure Purpose:** 21-03784

Summary of Interests

I do not have any interests to disclose at this time.

Additional Questions:

- 1. **Are there other relationships or activities that readers could perceive to have influenced, or that give the appearance of potentially influencing, what you wrote in the submitted work?**  
No.
- 2. **What is the manuscript title?**  
Early Convalescent Plasma for High Risk Outpatients with Covid-19
- 3. **Are you the corresponding author?**  
No.

Certification

I certify that the information provided in this disclosure is complete and accurate.



**Disclosure Purpose:** 21-03784

### Summary of Interests

I do not have any interests to disclose at this time.

### Additional Questions:

- Are there other relationships or activities that readers could perceive to have influenced, or that give the appearance of potentially influencing, what you wrote in the submitted work?**  
No.
- What is the manuscript title?**  
Early Convalescent Plasma for High Risk Outpatients with COVID-19
- Are you the corresponding author?**  
No.

### Certification

I certify that the information provided in this disclosure is complete and accurate.

Disclosure Purpose: 21-03784

## Summary of Interests

### Company or Organization

| Entity                                                                                | Type              | Interest Held By                                                                |
|---------------------------------------------------------------------------------------|-------------------|---------------------------------------------------------------------------------|
| <a href="#">AltitudeVentures</a>                                                      | Other Securities  | Self                                                                            |
| <i>Security Description:</i> Limited Partner                                          |                   | <i>Additional Information:</i>                                                  |
| <a href="#">Business Roundtable</a>                                                   | Consultant        | Self                                                                            |
| <i>Category:</i> Consultant<br><i>Additional Information:</i> Completed               |                   | <i>Description:</i> Literature review                                           |
| <a href="#">Business SchoolAlliance for Health Management</a>                         | Fiduciary Officer | Self                                                                            |
| <i>Official Title:</i> President<br><i>Additional Information:</i>                    |                   | <i>Position Description:</i> Not Compensated                                    |
| <a href="#">Catalysis,Inc.</a>                                                        | Fiduciary Officer | Self                                                                            |
| <i>Official Title:</i> Board Member<br><i>Additional Information:</i>                 |                   | <i>Position Description:</i> Uncompensated                                      |
| <a href="#">CivicaRx</a>                                                              | Other             | Self                                                                            |
| <i>Category:</i> Other<br><i>Additional Information:</i>                              |                   | <i>Description:</i> Advisory Board                                              |
| <a href="#">Cytokinetics</a>                                                          | Consultant        | Self                                                                            |
| <i>Category:</i> Consultant<br><i>Additional Information:</i> Completed               |                   | <i>Description:</i> Honorarium for Talk                                         |
| <a href="#">Excelebrate HealthVentures</a>                                            | Other Securities  | Self                                                                            |
| <i>Security Description:</i> Passive Investment in a Fund                             |                   | <i>Additional Information:</i>                                                  |
| <a href="#">FacultyConnection</a>                                                     | Fiduciary Officer | Self                                                                            |
| <i>Official Title:</i> Managing Member, Shareholder<br><i>Additional Information:</i> |                   | <i>Position Description:</i> Lead organization; all profits donated to charity. |
| <a href="#">Frazier Healthcare</a>                                                    | Consultant        | Self                                                                            |
| <i>Category:</i> Consultant<br><i>Additional Information:</i>                         |                   | <i>Description:</i> Review as part of due diligence                             |
| <a href="#">GRID Therapeutics</a>                                                     | Stock Option      | Self                                                                            |
| <i>Additional Information:</i> Board Member                                           |                   |                                                                                 |
| <a href="#">Health Services Research</a>                                              | Fiduciary Officer | Self                                                                            |
| <i>Official Title:</i> Senior Associate Editor<br><i>Additional Information:</i>      |                   | <i>Position Description:</i> Compensated Editor                                 |
| <a href="#">HealthQuest Capital, LLC</a>                                              | Consultant        | Self                                                                            |
| <i>Category:</i> Consultant<br><i>Additional Information:</i> Completed               |                   | <i>Description:</i> Honorarium for a Talk                                       |
| <a href="#">ISMIE</a>                                                                 | Consultant        | Self                                                                            |
| <i>Category:</i> Consultant<br><i>Additional Information:</i>                         |                   | <i>Description:</i> Speaker Honorarium                                          |
| <a href="#">MotleyRice,LLP</a>                                                        | Expert Witness    | Self                                                                            |
| <i>Category:</i> Expert Witness<br><i>Additional Information:</i> Opioid Litigation   |                   | <i>Description:</i> Opioid and PBM lawsuits                                     |
| <a href="#">Novartis</a>                                                              | Consultant        | Self                                                                            |

Category: Consultant  
Additional Information: Completed

Description: Study Design Advise

|          |              |      |
|----------|--------------|------|
| Prealize | Stock Option | Self |
|----------|--------------|------|

Additional Information:

|                      |                   |      |
|----------------------|-------------------|------|
| Reserve Therapeutics | Fiduciary Officer | Self |
|----------------------|-------------------|------|

Official Title: President  
Additional Information:

Position Description: President of pre-revenue company

## Intellectual Property

| Type                                                          | Is Licensed | Interest Held By |
|---------------------------------------------------------------|-------------|------------------|
| Patent - Methods, systems, and computer readable media fo ... | Yes         | Self             |

Description: Methods, systems, and computer readable media for dynamically selecting questions to be presented in

Patent Holder: Other Organization - UNC

Licensees:

| Licensee   | Title | Date   |
|------------|-------|--------|
| PressGaney | sale  | 1/1/19 |

Patent Number: 9,305,059

Patent Status: Issued

Filing Jurisdiction: USA

Additional Information:

|                                                               |    |      |
|---------------------------------------------------------------|----|------|
| Patent - Systems And Methods For Mobile Patient-Centric E ... | No | Self |
|---------------------------------------------------------------|----|------|

Description: Systems And Methods For Mobile Patient-Centric Electronic Health Record Data.  
Provision Filed April

Patent Holder: Previous Institution

Licensees:

Patent Number: PCT/US2017/027310

Patent Status: Pending

Filing Jurisdiction: USA

Additional Information:

## Additional Questions:

1. Are there other relationships or activities that readers could perceive to have influenced, or that give the appearance of potentially influencing, what you wrote in the submitted work?  
No.
2. What is the manuscript title?  
Early Convalescent Plasma for High Risk Outpatients with Covid-19
3. Are you the corresponding author?  
No.

## Certification

I certify that the information provided in this disclosure is complete and accurate.



**Disclosure Purpose:** 21-03784

Summary of Interests

I do not have any interests to disclose at this time.

Additional Questions:

- 1. **Are there other relationships or activities that readers could perceive to have influenced, or that give the appearance of potentially influencing, what you wrote in the submitted work?**  
No.
- 2. **What is the manuscript title?**  
Early Convalescent Plasma for High-Risk Outpatients with Covid-19
- 3. **Are you the corresponding author?**  
No.

Certification

I certify that the information provided in this disclosure is complete and accurate.

**Disclosure Purpose:** 21-03784

## Summary of Interests

| Company or Organization                                                                                                       |       |                                      |
|-------------------------------------------------------------------------------------------------------------------------------|-------|--------------------------------------|
| Entity                                                                                                                        | Type  | Interest Held By                     |
| American Association for Respiratory Care                                                                                     | Other | Self                                 |
| <i>Category:</i> Other<br><i>Additional Information:</i> There is no compensation or allegiance. I am invited on ad hoc basis |       | <i>Description:</i> Journal reviewer |

## Additional Questions:

- Are there other relationships or activities that readers could perceive to have influenced, or that give the appearance of potentially influencing, what you wrote in the submitted work?**  
No.
- What is the manuscript title?**  
"Early Convalescent Plasma for High Risk Outpatients with Covid-19"
- Are you the corresponding author?**  
No.

## Certification

I certify that the information provided in this disclosure is complete and accurate.

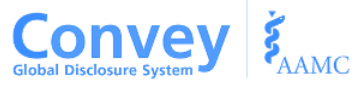

Disclosure Purpose: 21-03784

Summary of Interests

**Company or Organization**

| Entity                                                                   | Type       | Interest Held By                           |
|--------------------------------------------------------------------------|------------|--------------------------------------------|
| <a href="#">Fresenius Kabi USA, LLC</a>                                  | Consultant | Self                                       |
| <i>Category:</i> Consultant<br><i>Additional Information:</i> \$450/hour |            | <i>Description:</i> Medical Advisory Board |
| <a href="#">realta life sciences</a>                                     | Consultant | Self                                       |
| <i>Category:</i> Consultant<br><i>Additional Information:</i> \$400/hour |            | <i>Description:</i> Medical Advisory Board |

Additional Questions:

- Are there other relationships or activities that readers could perceive to have influenced, or that give the appearance of potentially influencing, what you wrote in the submitted work?**  
No.
- What is the manuscript title?**  
Early Convalescent plasma for high risk outpatients with CVOID-19
- Are you the corresponding author?**  
No.

Certification

I certify that the information provided in this disclosure is complete and accurate.

**Disclosure Purpose:** 21-03784

Summary of Interests

I do not have any interests to disclose at this time.

Additional Questions:

- 1. **Are there other relationships or activities that readers could perceive to have influenced, or that give the appearance of potentially influencing, what you wrote in the submitted work?**  
No.
- 2. **What is the manuscript title?**  
Early Convalescent Plasma for High Risk Outpatients with Covid-19
- 3. **Are you the corresponding author?**  
No.

Certification

I certify that the information provided in this disclosure is complete and accurate.



**Disclosure Purpose:** 21-03784

**Summary of Interests**

I do not have any interests to disclose at this time.

**Additional Questions:**

- 1. **Are there other relationships or activities that readers could perceive to have influenced, or that give the appearance of potentially influencing, what you wrote in the submitted work?**  
No.
- 2. **What is the manuscript title?**  
Early Convalescent Plasma for High Risk Outpatients with Covid-19
- 3. **Are you the corresponding author?**  
No.

**Certification**

I certify that the information provided in this disclosure is complete and accurate.

Disclosure Purpose: 21-03784

Summary of Interests

**Company or Organization**

| Entity                                                                                                                                                                                            | Type                       | Interest Held By                                                                |
|---------------------------------------------------------------------------------------------------------------------------------------------------------------------------------------------------|----------------------------|---------------------------------------------------------------------------------|
| <a href="#">C. R. Bard, Inc. &amp; Subsidiaries</a>                                                                                                                                               | Data And Safety Monitoring | Self                                                                            |
| <i>Category:</i> Data And Safety Monitoring<br><i>Additional Information:</i>                                                                                                                     |                            | <i>Description:</i> Member of DSMB for INTREPID. Fees paid to institution       |
| <a href="#">National Heart, Lung, and Blood Institute</a>                                                                                                                                         | Grant / Contract           | Self                                                                            |
| <i>Recipient Name:</i> Medical University of South Carolina<br><i>Grant / Contract Description:</i> Various, related to statistical and data coordination<br><i>Additional Information:</i>       |                            | <i>Recipient Type:</i> Institution<br><i>Grant / Contract Purpose:</i> Research |
| <a href="#">National Institute of Neurological Disorders and Stroke</a>                                                                                                                           | Grant / Contract           | Self                                                                            |
| <i>Recipient Name:</i> Medical University of South Carolina<br><i>Grant / Contract Description:</i> Various grants related to statistical and data coordination<br><i>Additional Information:</i> |                            | <i>Recipient Type:</i> Institution<br><i>Grant / Contract Purpose:</i> Research |

**Intellectual Property**

| Type                                                                                                                                                                                        | Is Licensed | Interest Held By                                                                       |      |                             |  |  |  |  |
|---------------------------------------------------------------------------------------------------------------------------------------------------------------------------------------------|-------------|----------------------------------------------------------------------------------------|------|-----------------------------|--|--|--|--|
| <a href="#">Copyright - Editorial Board for Stroke</a>                                                                                                                                      | Yes         | Self                                                                                   |      |                             |  |  |  |  |
| <i>Description:</i> Editorial Board for Stroke<br><i>Filing Jurisdiction:</i><br><i>Licensees:</i>                                                                                          |             | <i>Copyright Number:</i><br><i>Copyright Holder:</i><br><i>Additional Information:</i> |      |                             |  |  |  |  |
| <table border="1"> <thead> <tr> <th>Licensee</th> <th>Title</th> <th>Date</th> </tr> </thead> <tbody> <tr> <td>American Stroke Association</td> <td></td> <td></td> </tr> </tbody> </table> | Licensee    | Title                                                                                  | Date | American Stroke Association |  |  |  |  |
| Licensee                                                                                                                                                                                    | Title       | Date                                                                                   |      |                             |  |  |  |  |
| American Stroke Association                                                                                                                                                                 |             |                                                                                        |      |                             |  |  |  |  |

Additional Questions:

- Are there other relationships or activities that readers could perceive to have influenced, or that give the appearance of potentially influencing, what you wrote in the submitted work?**  
No.
- What is the manuscript title?**  
Early Convalescent Plasma for High-Risk Outpatients with Covid-19
- Are you the corresponding author?**  
No.

Certification

I certify that the information provided in this disclosure is complete and accurate.
